# Supplementary material for: Comparative Analysis of Differentially Expressed miRNAs in Leaves of Three Sugarcane (Saacharum Officinarum L.) Cultivars During Salinity Stress
Source: Research Square preprint supplement (doi:10.21203/rs.3.rs-769558/v1), 2021-08-09
Supplement: Supplementary file 1 [file 40398d385b6b79af49285843.xlsx]

## Sheet: Table S4 A
Table S4. ANOVA for the effect of salinity stress on nine target genes relative expression in three cultivars compare to control.
S.O.V	Df	Sum Sq	Mean Sq	F value	P value
Block	2	11.01	5.51	6.164	0.0180*
Salt level	1	4.69	4.69	5.247	0.0450*
Cultivar	2	159.82	79.91	89.465	4.15e-07***
Salt × Cultivar	2	9.05	4.52	5.065	0.0303*
Residuals	10	8.93	0.89
CV %	26.02	------	------	------	------
Asterisk, double asterisk, and triple asterisk significance level at the 0.05, 0.01, and 0.001 levels respectively; S.O.V, source of variance; Df, degrees of freedom; SS, sum of squares; MS, mean squares; CV, coefficient variation.

## Sheet: Table S4 B
Table S4. ANOVA for the effect of salinity stress on nine target genes relative expression in three cultivars compare to control.
S.O.V	Df	Sum Sq	Mean Sq	F value	P value
Block	2	11.01	5.51	6.164	0.0180*
Salt level	1	4.69	4.69	5.247	0.0450*
Cultivar	2	159.82	79.91	89.465	4.15e-07***
Salt × Cultivar	2	9.05	4.52	5.065	0.0303*
Residuals	10	8.93	0.89
CV %	26.02	------	------	------	------
Asterisk, double asterisk, and triple asterisk significance level at the 0.05, 0.01, and 0.001 levels respectively; S.O.V, source of variance; Df, degrees of freedom; SS, sum of squares; MS, mean squares; CV, coefficient variation.
